# Supplementary material for: Kisspeptin treatment induces gonadotropic responses and rescues ovulation in a subset of preclinical models and women with polycystic ovary syndrome
Source: PubMed Central journal article supplement — Hum Reprod. 2019 Dec 10;34(12):2495–512. doi: 10.1093/humrep/dez205 (PMC6936723; doi:10.1093/humrep/dez205), 2019-12-10
Supplement: sup_f1_dez205.pdf [file sup_f1_dez205.pdf]

## PCOS MODELS & KP INTERVENTION

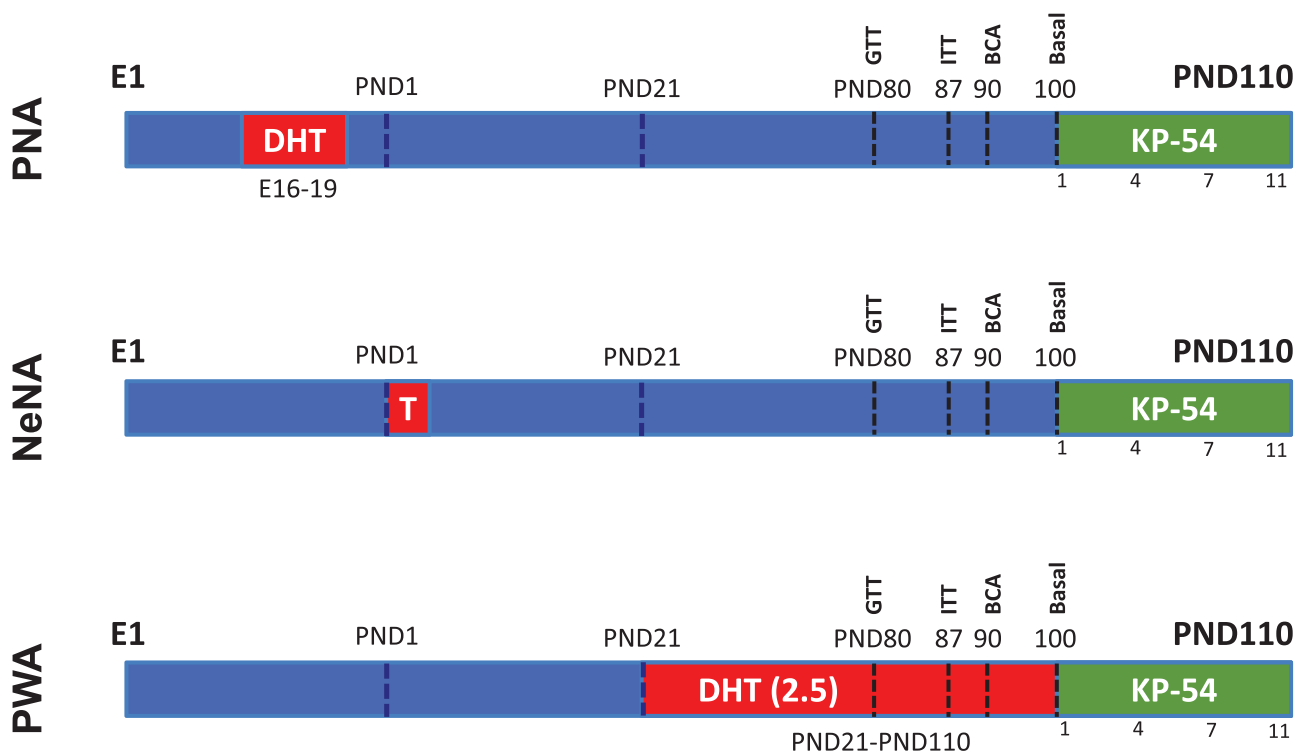

**Supplementary Figure S1** Experimental design of preclinical studies: PCOS models and pharmacological intervention. Three preclinical models of polycystic ovary syndrome (PCOS), generated by androgen exposure during specific age windows, were used: PNA (for prenatal androgenization), generated by daily sc injections of dihydrotestosterone (DHT) to pregnant rats between gestational days 16 and 19; NeNA (for neonatal androgenization), produced by a single sc injection of testosterone propionate (T) to newborn female rats; and PWA (for post-weaning androgenization), generated by implanting female rats at the day of weaning (postnatal day 21; PND21) with silastic capsules filled with DHT. The animals ( $N = 20$  per model) were followed up to adulthood, when they were subjected to protocols of daily s.c. injections of 100  $\mu\text{g}/\text{kg}$  of kisspeptin-54 (KP-54) or vehicle for a period of 11 days. Specific sampling and analyses were conducted at Days 1, 4, 7 and 11 after initiation of KP-54 treatments, as described in Materials and Methods. Animals injected with vehicle served as reference controls. Before initiation of KP-54 administration (at PND100), the animals were subjected to phenotypic characterization, including implementation of glucose and insulin tolerance tests (GTT & ITT, respectively), body composition analyses (BCA) and blood sampling for determination of basal gonadotrophin levels (Basal); the timeline for these analyses is depicted also in the scheme. Group sizes were  $N = 10$  per model (PNA, NeNA, PWA) and pharmacological (KP-54, vehicle) treatment.
