# Supplementary material for: Kisspeptin treatment induces gonadotropic responses and rescues ovulation in a subset of preclinical models and women with polycystic ovary syndrome
Source: PubMed Central journal article supplement — Hum Reprod. 2019 Dec 10;34(12):2495–512. doi: 10.1093/humrep/dez205 (PMC6936723; doi:10.1093/humrep/dez205), 2019-12-10
Supplement: sup_f3_dez205.pdf [file sup_f3_dez205.pdf]

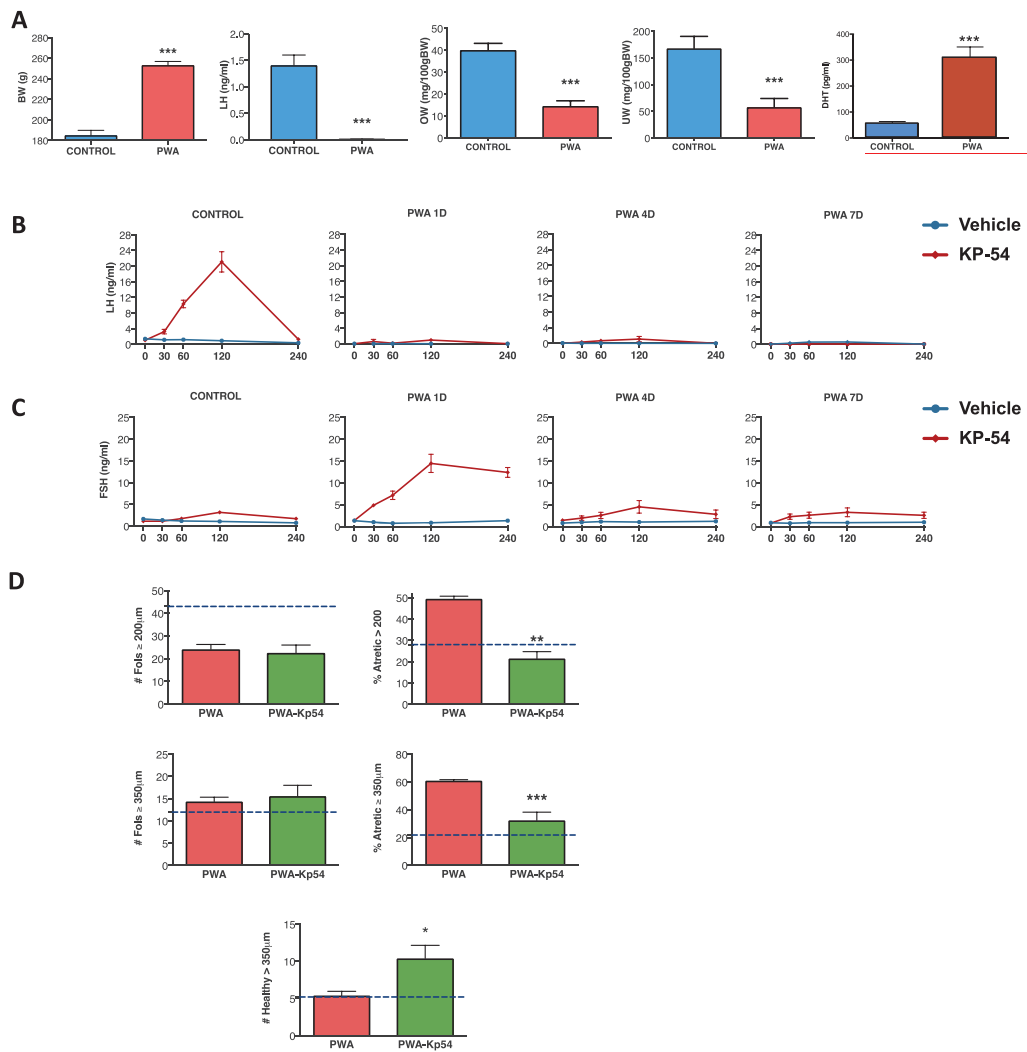

**Supplementary Figure S3 Validation and initial pharmacological studies in PWA rats as a suitable PCOS model.** Phenotypic characterization of the PWA model, generated in this initial set of studies by continuous DHT administration via a silastic capsule containing 7.5 mg DHT. In panel (A), body weight (BW), basal LH, ovarian (O/W) and uterus weight (U/W), as well as actual DHT levels at the end of the 90-day treatment period, are shown in a representative subset of PWA 7.5 animals ( $N = 10$ ). In panels (B) and (C), LH and FSH responses to repeated KP-54 administration are presented at Days 1, 4 and 7 after initiation of KP-54 treatments (100 µg/kg, daily s.c. injections) ( $N = 10$ ). For comparative purposes, acute LH and FSH responses to a single bolus of KP-54 in control female rats are also shown. Note the nearly undetectable basal LH levels, and the severely blunted LH responses to KP-54 in this 7.5-mg DHT PWA model, despite enhanced FSH responses. Finally, in panel (D), ovarian responses to daily administration of KP-54 for 7 days in this PWA model are shown ( $N = 5$ ). Repeated KP-54 administration resulted in trophic ovarian responses, including a decrease in the number of atretic follicles and an increase in the number of healthy follicles of  $>350$  µm of diameter, but did not rescue ovulation. Blue dotted lines represent the mean values obtained in control, non-androgenized female rats, used as reference. In all panels, each histogram represents the mean  $\pm$  SEM. Data were analyzed by Student  $t$  tests (in panel A,  $***P < 0.001$  versus control group; in panel D,  $*P < 0.05$ ,  $**P < 0.01$ ,  $***P < 0.001$  versus PNA rats treated with vehicle).
