# Supplementary material for: Kisspeptin treatment induces gonadotropic responses and rescues ovulation in a subset of preclinical models and women with polycystic ovary syndrome
Source: PubMed Central journal article supplement — Hum Reprod. 2019 Dec 10;34(12):2495–512. doi: 10.1093/humrep/dez205 (PMC6936723; doi:10.1093/humrep/dez205), 2019-12-10
Supplement: sup_f4_dez205.pdf [file sup_f4_dez205.pdf]

## PCOS MODELS: OVARIAN PHENOTYPE

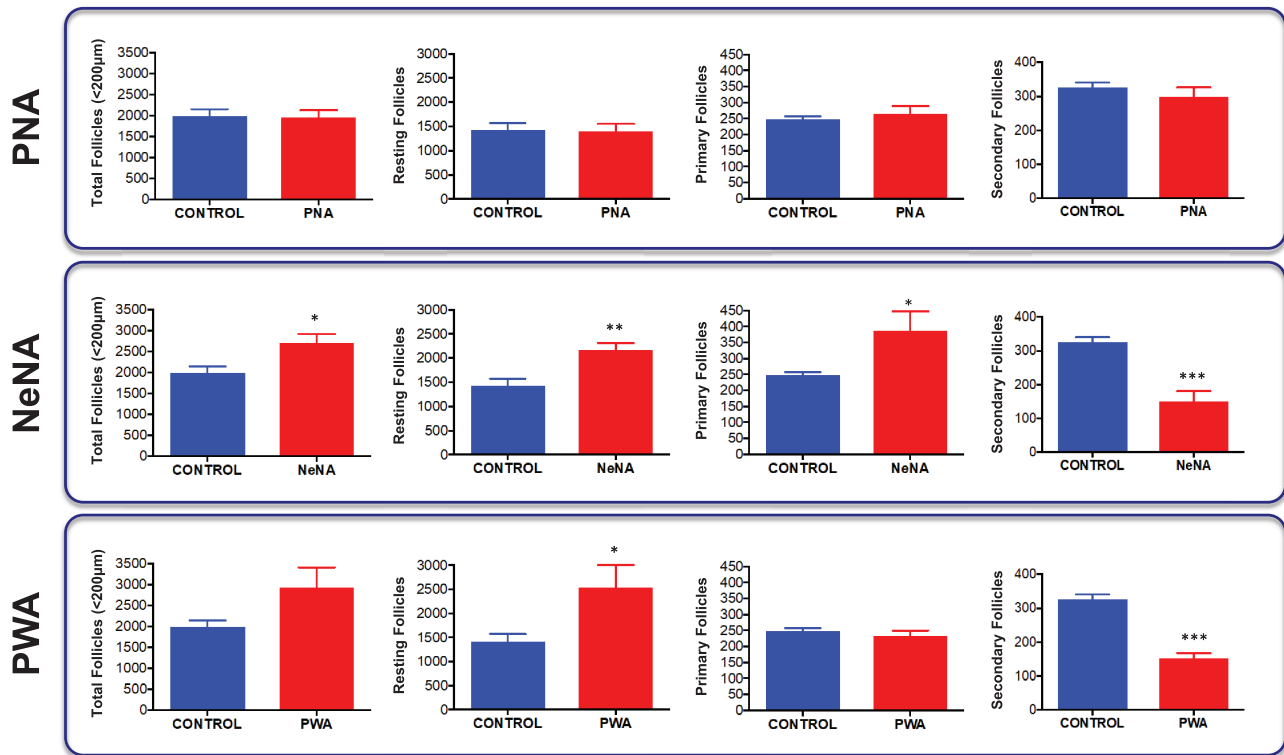

**Supplementary Figure S4 Morphometric features of early follicular maturation in the preclinical PCOS models.** Quantitative analyses are shown of early follicular stages (from primordial to preantral) in the ovaries of the three preclinical models of PCOS (PNA, NeNA and PWA) at adulthood. Bar graphs represent data on total (<200 µm), resting, primary and secondary follicles. Data from the corresponding non-androgenized control animals are also shown. Each histogram represents the mean ± SEM. Depending on initial morphometric data and optimally fixed tissue availability, ovaries from 5–10 independent animals were studied per model. Data were analyzed by Student *t* tests (\**P* < 0.05, \*\**P* < 0.01, \*\*\**P* < 0.001 versus control groups).
