# Supplementary material for: Kisspeptin treatment induces gonadotropic responses and rescues ovulation in a subset of preclinical models and women with polycystic ovary syndrome
Source: PubMed Central journal article supplement — Hum Reprod. 2019 Dec 10;34(12):2495–512. doi: 10.1093/humrep/dez205 (PMC6936723; doi:10.1093/humrep/dez205), 2019-12-10
Supplement: sup_f6_dez205.pdf [file sup_f6_dez205.pdf]

## PWA RATS: OVARIAN RESPONSES TO KP

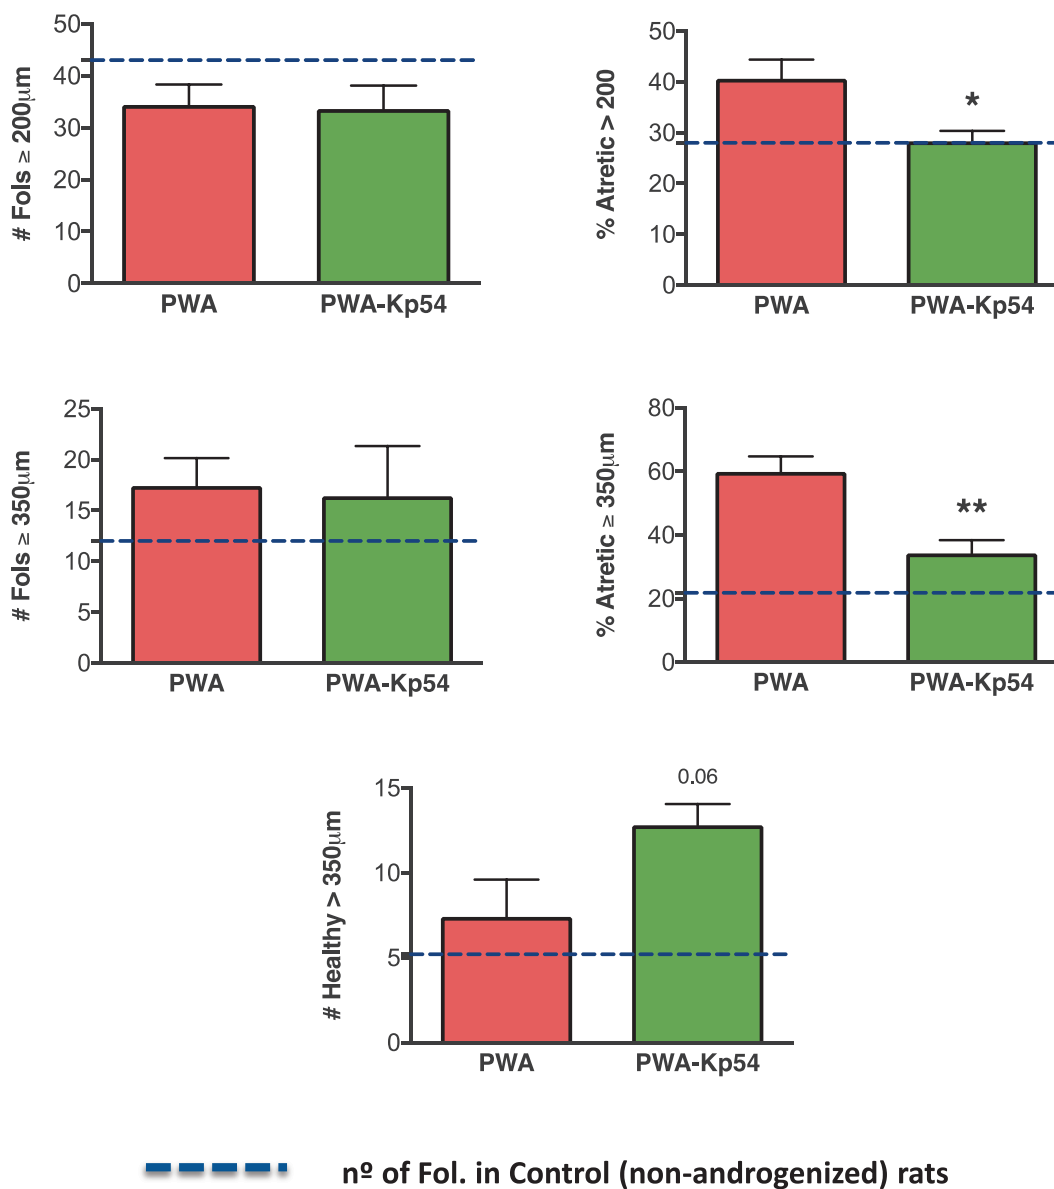

**Supplementary Figure S6 Analysis of ovarian responses to KP-54 in PWA rats.** Quantitative analyses of follicular responses to KP-54 administration are presented from PWA rats, as this model displays gonadotrophin (mainly FSH) responses but rescue of ovulation is not achieved. Bar graphs represent data on the total number of follicles, of diameters  $>200$  and  $>350$   $\mu\text{m}$ , as well as the percentage of atretic follicles and the number of healthy follicles, of diameter  $>350$   $\mu\text{m}$ , resting, primary and secondary follicles. Dotted lines indicate reference values from control (non-androgenized) adult female rats. Each histogram represents the mean  $\pm$  SEM. Based on initial morphometric data and tissue availability, ovaries from five independent animals were studied. Data were analyzed by Student *t* tests (\* $P < 0.05$ , \*\* $P < 0.01$  versus vehicle-treated groups).
