# Supplementary material for: Kisspeptin treatment induces gonadotropic responses and rescues ovulation in a subset of preclinical models and women with polycystic ovary syndrome
Source: PubMed Central journal article supplement — Hum Reprod. 2019 Dec 10;34(12):2495–512. doi: 10.1093/humrep/dez205 (PMC6936723; doi:10.1093/humrep/dez205), 2019-12-10
Supplement: sup_f7_dez205.pdf [file sup_f7_dez205.pdf]

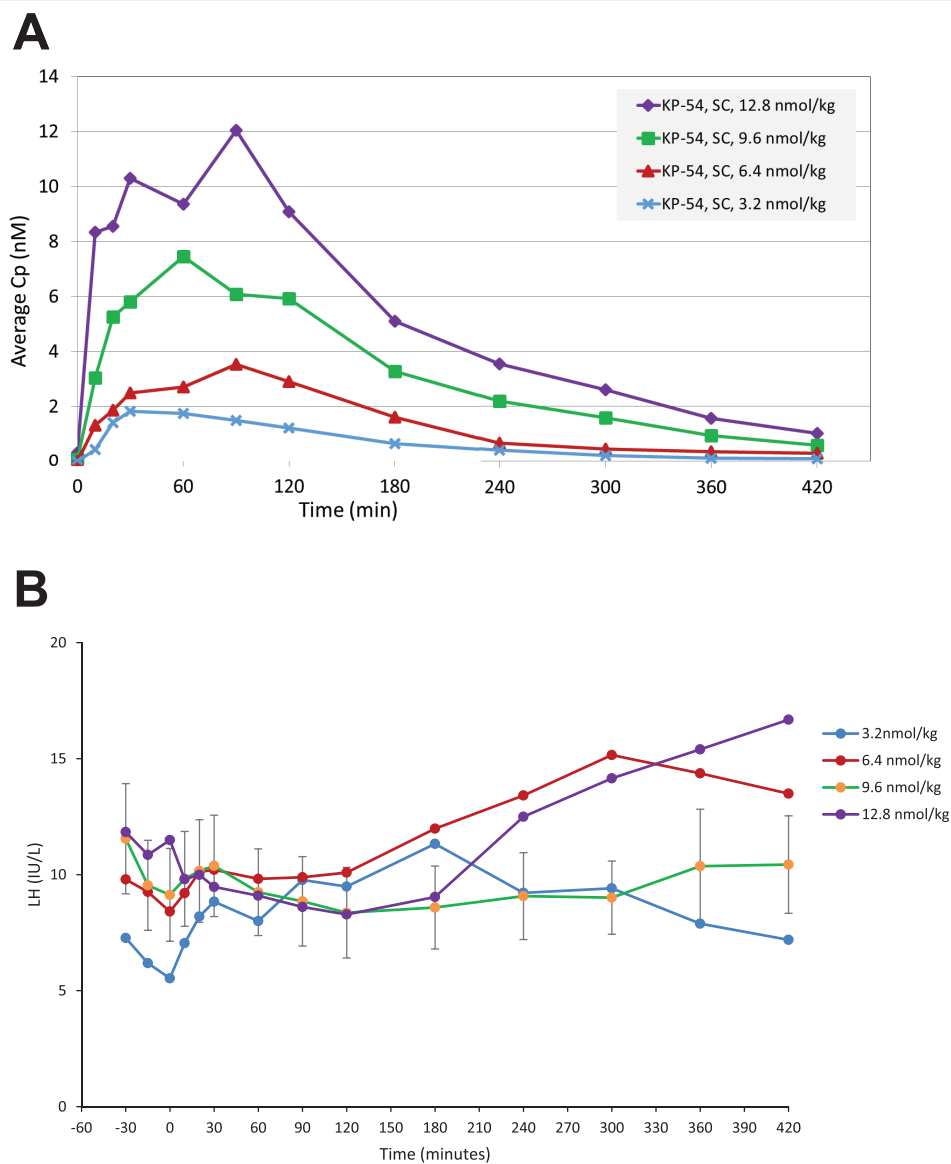

**Supplementary Figure S7 Pharmacokinetics of KP-54 and LH responses in dose-exploration studies in PCOS patients.** In panel **A**, the kinetics of KP-54 levels in patients ( $N=5$ ) participating in dose-exploration studies are presented. Doses of 3.2, 6.4, 9.8 and 12.8 nmol/kg were injected and circulating KP levels assayed at 11 time points over a 420-min period. In panel **B**, LH concentrations after administration of the first injection of KP-54 are shown. KP-54 was administered sc and blood samples taken at frequent intervals as indicated, from 60 min before injection to 420 min thereafter. Data are presented as the mean, with SEM indicated for one dose only for clarity. Doses were 3.2, 6.4, 9.6 and 12.8 nmol/kg.
