# Supplementary material for: Kisspeptin treatment induces gonadotropic responses and rescues ovulation in a subset of preclinical models and women with polycystic ovary syndrome
Source: PubMed Central journal article supplement — Hum Reprod. 2019 Dec 10;34(12):2495–512. doi: 10.1093/humrep/dez205 (PMC6936723; doi:10.1093/humrep/dez205), 2019-12-10
Supplement: sup_t1_dez205.pdf [file sup_t1_dez205.pdf]

**Supplementary Table S1** Validation scheme for the generation of the rat prenatal androgenization model of PCOS.

| Model | Reference                                          | Androgen | Dose       | Timing                | Male/female pups |
|-------|----------------------------------------------------|----------|------------|-----------------------|------------------|
| PNA   | Yan <i>et al.</i> J. Endocrinol (2013) 217:119–129 | DHT      | 5 mg/day   | Gestational day 16–19 | Not reported     |
| PNA   | Yan <i>et al.</i> J. Endocrinol (2014) 222:73–85   | DHT      | 5 mg/day   | Gestational day 16–19 | Not reported     |
| PNA   | Osuka <i>et al.</i> Endocrinol (2017) 158:367–377  | DHT      | 3 mg/day   | Gestational day 16–19 | Not reported     |
| PNA   | Our pilot validation#1                             | DHT      | 5 mg/day   | Gestational day 16–19 | 2/0              |
| PNA   | Our pilot validation#2                             | DHT      | 1.5 mg/day | Gestational day 16–18 | 5/5              |
| PNA   | Our pilot validation#3                             | DHT      | 1.5 mg/day | Gestational day 16–19 | 5/6              |
| PNA   | Our pilot validation#4                             | DHT      | 3 mg/day   | Gestational day 16–18 | 6/5              |
| PNA   | Our pilot validation#5                             | DHT      | 3 mg/day   | Gestational day 16–19 | 5/5              |

PNA: prenatal androgenization, DHT: dihydrotestosterone

Previous references of protocols of gestational androgenization by DHT administration to pregnant dams are quoted. In addition, the different protocols of PNA tested in our team are also displayed. The model shadowed in gray was selected for pharmacological studies of repeated kisspeptin (KP)-54 administration.
